# Supplementary material for: AURKB Enhances Chromosomal Remodeling of Telomeric Genes and Accelerates Tumorigenesis of Uveal Melanoma
Source: PubMed Central journal article supplement (PMC10132317; doi:10.1167/iovs.64.4.23), 2023-04-20
Supplement: iovs-64-4-23_s001.pdf [file iovs-64-4-23_s001.pdf]

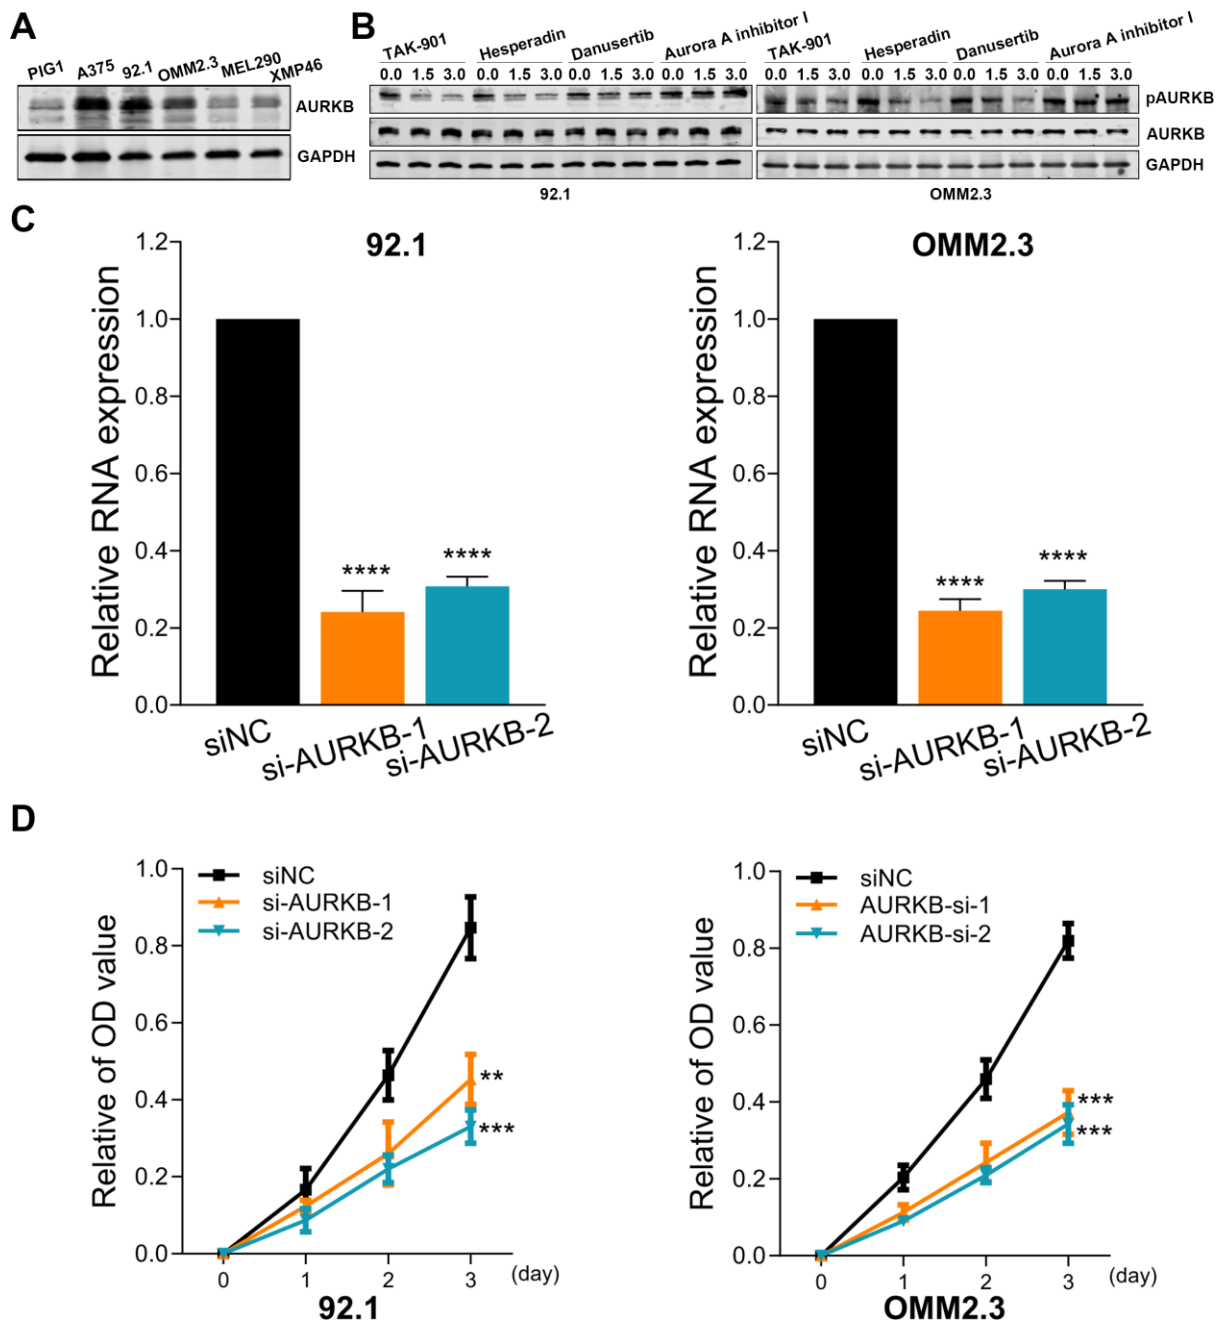

**Supplementary figure 1.** AURKB knockdown inhibited the growth of uveal melanoma. (A) Immunoblotting analysis of AURKB in normal control cell line PIG1 and melanoma cell lines. (B) Immunoblotting analysis of phospho-AURKB<sup>T232</sup> and total AURKB in 92.1 and OMM2.3 cells treated with 0, 1.5 and 3.0  $\mu$ M hesperadin for 24 hours. (C) AURKB knockdown efficiency was tested using RT-qPCR in 92.1 and OMM2.3. (D) Cell proliferation was analyzed by CCK8 assay.

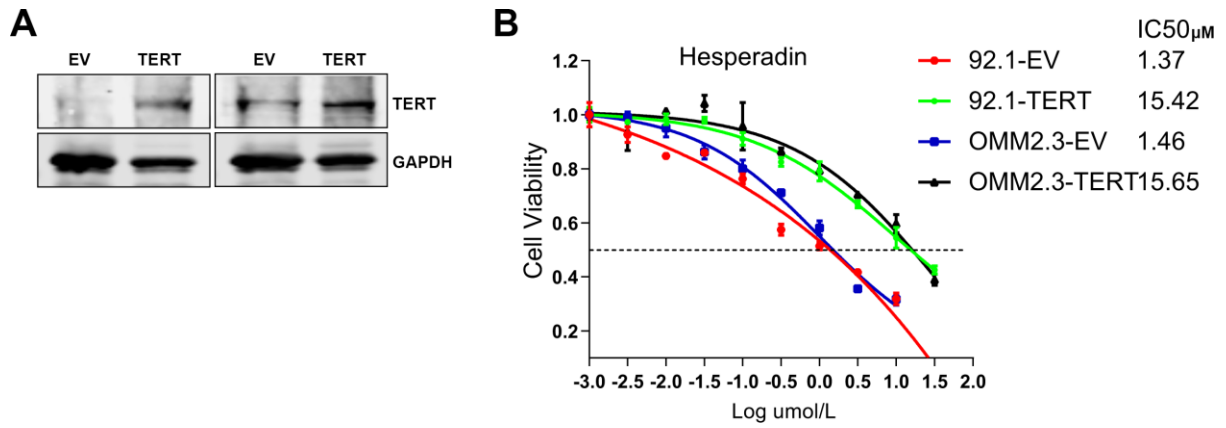

**Supplementary figure 2.** TERT induced chemoresistance of uveal melanoma to hesperadin. (A) Immunoblotting analysis of TERT in 92.1 and OMM2.3 with TERT overexpression. (B) Hesperadin was examined for its anti-tumor efficacy on 92.1 and OMM2.3 cells with TERT overexpression. IC<sub>50</sub> values were calculated using GraphPad Software 8.0.1.
